# Supplementary material
Source: MDPI journal article supplement (https://www.mdpi.com/2227-9717/11/5/1563)
Supplement: s1 [file s1]

# Construction of a Green-Comprehensive Evaluation System for Flotation Collectors

Hongxiang Xu <sup>1,\*</sup>, Jiahua Cui <sup>1</sup>, Yijun Cao <sup>2</sup>, Lin Ma <sup>1</sup>, Guixia Fan <sup>2</sup>, Gen Huang <sup>1</sup>, Kejia Ning <sup>1</sup>, Jingzheng Wang <sup>1</sup>, Yuntao Kang <sup>1</sup>, Xin Sun <sup>1</sup>, Jiushuai Deng <sup>1,\*</sup> and Shan Li <sup>1</sup>

<sup>1</sup> School of Chemistry and Environmental Engineering, China University of Mining and Technology-Beijing, Beijing 100083, China; cuijiahua99@163.com (J.C.); umario2333@163.com (L.M.); huanggencumtb@163.com (G.H.); ningkejia@foxmail.com (K.N.); wjzcumtb2018@163.com (J.W.); ytk542968@163.com (Y.K.); sx3295070032@163.com (X.S.); lishan997@163.com (S.L.)

<sup>2</sup> Henan Province Industrial Technology Research Institute of Resources & Materials, Zhengzhou University, Zhengzhou 450001, China; yijuncao@126.com (Y.C.); cumtfgx@126.com (G.F.)

\* Correspondence: 201535@cumtb.edu.cn (H.X.); dengshuai689@163.com (J.D.)

Table S1. Physical and chemical hazard index weight determination table

| B <sub>1</sub>  | C <sub>1</sub> | C <sub>2</sub> | C <sub>3</sub> | C <sub>4</sub> | C <sub>5</sub> | C <sub>6</sub> | C <sub>7</sub> | C <sub>8</sub> | C <sub>9</sub> | C <sub>10</sub> | Weight |
|-----------------|----------------|----------------|----------------|----------------|----------------|----------------|----------------|----------------|----------------|-----------------|--------|
| C <sub>1</sub>  | 1              | 1/2            | 3              | 5              | 5              | 4              | 1/2            | 1/2            | 1/5            | 1/4             | 0.0772 |
| C <sub>2</sub>  | 2              | 1              | 4              | 5              | 5              | 4              | 1/3            | 1/3            | 1/6            | 1/5             | 0.0808 |
| C <sub>3</sub>  | 1/3            | 1/4            | 1              | 2              | 3              | 3              | 1/4            | 1/4            | 1/6            | 1/5             | 0.0407 |
| C <sub>4</sub>  | 1/5            | 1/5            | 1/2            | 1              | 2              | 2              | 1/5            | 1/4            | 1/5            | 1/4             | 0.0309 |
| C <sub>5</sub>  | 1/5            | 1/5            | 1/3            | 1/2            | 1              | 1/2            | 1/4            | 1/5            | 1/6            | 1/5             | 0.0216 |
| C <sub>6</sub>  | 1/4            | 1/4            | 1/3            | 1/2            | 2              | 1              | 1/3            | 1/5            | 1/6            | 1/5             | 0.0267 |
| C <sub>7</sub>  | 2              | 3              | 4              | 5              | 4              | 3              | 1              | 1/2            | 1/3            | 1/2             | 0.1170 |
| C <sub>8</sub>  | 2              | 3              | 4              | 4              | 5              | 5              | 2              | 1              | 1/2            | 1/2             | 0.1473 |
| C <sub>9</sub>  | 5              | 6              | 6              | 5              | 6              | 6              | 3              | 2              | 1              | 2               | 0.2626 |
| C <sub>10</sub> | 4              | 5              | 5              | 4              | 5              | 5              | 2              | 2              | 1/2            | 1               | 0.1952 |

Table S2. Stability and reactivity index weight determination table

| B <sub>2</sub>  | C <sub>11</sub> | C <sub>12</sub> | C <sub>13</sub> | C <sub>14</sub> | Weight |
|-----------------|-----------------|-----------------|-----------------|-----------------|--------|
| C <sub>11</sub> | 1               | 1/7             | 1/2             | 1/4             | 0.0655 |
| C <sub>12</sub> | 7               | 1               | 5               | 3               | 0.5731 |
| C <sub>13</sub> | 2               | 1/5             | 1               | 1/3             | 0.1082 |
| C <sub>14</sub> | 4               | 1/3             | 3               | 1               | 0.2532 |

Table S3. Table for determining the weight of environmental impact indicators

| B <sub>3</sub>  | C <sub>15</sub> | C <sub>16</sub> | C <sub>17</sub> | C <sub>18</sub> | Weight |
|-----------------|-----------------|-----------------|-----------------|-----------------|--------|
| C <sub>15</sub> | 1               | 5               | 7               | 8               | 0.6528 |
| C <sub>16</sub> | 1/5             | 1               | 2               | 3               | 0.1655 |
| C <sub>17</sub> | 1/7             | 1/2             | 1               | 2               | 0.1081 |
| C <sub>18</sub> | 1/8             | 1/3             | 1/2             | 1               | 0.0736 |

Table S4. Weight determination table of health impact indicators

| B <sub>4</sub>  | C <sub>19</sub> | C <sub>20</sub> | C <sub>21</sub> | C <sub>22</sub> | C <sub>23</sub> | C <sub>24</sub> | C <sub>25</sub> | Weight |
|-----------------|-----------------|-----------------|-----------------|-----------------|-----------------|-----------------|-----------------|--------|
| C <sub>19</sub> | 1               | 2               | 4               | 5               | 6               | 8               | 3               | 0.3421 |
| C <sub>20</sub> | 1/2             | 1               | 3               | 4               | 5               | 7               | 2               | 0.2353 |
| C <sub>21</sub> | 1/4             | 1/3             | 1               | 3               | 4               | 6               | 1/2             | 0.1162 |
| C <sub>22</sub> | 1/5             | 1/4             | 1/3             | 1               | 2               | 5               | 1/3             | 0.0657 |
| C <sub>23</sub> | 1/6             | 1/5             | 1/4             | 1/2             | 1               | 6               | 1/7             | 0.0444 |
| C <sub>24</sub> | 1/8             | 1/7             | 1/6             | 1/5             | 1/6             | 1               | 1/8             | 0.0198 |
| C <sub>25</sub> | 1/3             | 1/2             | 2               | 3               | 7               | 8               | 1               | 0.1765 |

Table S5. Determination table of weight of drug effect index

| B <sub>5</sub>  | C <sub>26</sub> | C <sub>27</sub> | C <sub>28</sub> | Weight |
|-----------------|-----------------|-----------------|-----------------|--------|
| C <sub>26</sub> | 1               | 2               | 3               | 0.5396 |
| C <sub>27</sub> | 1/2             | 1               | 2               | 0.2970 |
| C <sub>28</sub> | 1/3             | 1/2             | 1               | 0.1634 |

Table S6. Industrial analysis and elemental analysis of long flame coal

| Industrial analysis (%) |                |                  |                   | Elementary analysis (%) |                |                |                |                   |
|-------------------------|----------------|------------------|-------------------|-------------------------|----------------|----------------|----------------|-------------------|
| M <sub>ad</sub>         | A <sub>d</sub> | V <sub>daf</sub> | FC <sub>daf</sub> | C <sub>d</sub>          | H <sub>d</sub> | N <sub>d</sub> | O <sub>d</sub> | S <sub>t, d</sub> |
| 6.04                    | 30.56          | 38.75            | 61.25             | 54.08                   | 3.27           | 0.93           | 10.80          | 0.36              |

Table S7. Collector list

| Collector        | Performance specification | Molecular formula                              |
|------------------|---------------------------|------------------------------------------------|
| N-octane         | AR                        | C <sub>8</sub> H <sub>18</sub>                 |
| Dodecane         | AR                        | C <sub>12</sub> H <sub>26</sub>                |
| 1-octanol        | AR                        | C <sub>8</sub> H <sub>18</sub> O               |
| 2-octanone       | Content > 98 %            | C <sub>8</sub> H <sub>16</sub> O               |
| Valeraldehyde    | Content > 98 %            | C <sub>5</sub> H <sub>10</sub> O               |
| Dodecyl aldehyde | Content > 98 %            | C <sub>12</sub> H <sub>24</sub> O              |
| Methyl laurate   | Content > 98 %            | C <sub>13</sub> H <sub>26</sub> O <sub>2</sub> |

Table S8. Experimental results of coal slurry flotation with different collectors

| Collector        | Collector dosage/<br>(kg/t) | Cleaned coal /% |       | Tail coal /% |       | Flotation perfection index/% | Combustible recovery /% |
|------------------|-----------------------------|-----------------|-------|--------------|-------|------------------------------|-------------------------|
|                  |                             | productivity    | Ash   | productivity | Ash   |                              |                         |
| Dodecane         | 8.0                         | 45.41           | 13.82 | 54.59        | 40.58 | 26.88                        | 53.30                   |
| N-octane         | 1.0                         | 32.49           | 14.05 | 67.51        | 37.56 | 19.50                        | 38.25                   |
| Dodecyl aldehyde | 1.0                         | 57.05           | 14.22 | 42.95        | 48.75 | 32.73                        | 66.55                   |
| Methyl laurate   | 1.0                         | 54.26           | 14.19 | 45.74        | 46.96 | 31.98                        | 63.68                   |
| 1-octanol        | 2.0                         | 36.48           | 13.79 | 63.52        | 38.20 | 21.80                        | 42.83                   |
| 2-octanone       | 2.0                         | 32.05           | 13.92 | 67.95        | 36.42 | 19.38                        | 37.77                   |
| Valeraldehyde    | 4.0                         | 38.24           | 14.99 | 61.76        | 38.41 | 21.85                        | 44.79                   |

Table S9. Collector flotation test data index table

| Flotation test<br>Tertiary index | Dodecane | Dodecyl aldehyde | Methyl laurate | N-octane | 1-octanol | 2-octanone | Valeraldehyde |
|----------------------------------|----------|------------------|----------------|----------|-----------|------------|---------------|
|                                  |          |                  |                |          |           |            |               |
| C <sub>26</sub>                  | 45.41    | 57.05            | 54.26          | 32.29    | 36.48     | 32.05      | 38.24         |
| C <sub>27</sub>                  | 53.30    | 66.55            | 63.68          | 38.25    | 42.83     | 37.77      | 44.79         |
| C <sub>28</sub>                  | 26.88    | 32.73            | 31.98          | 19.50    | 21.80     | 19.38      | 21.85         |
| C <sub>29</sub>                  | 5.00     | 50.00            | 18.00          | 10.00    | 10.00     | 15.00      | 15.00         |
| C <sub>30</sub>                  | 8.00     | 1.00             | 1.00           | 1.00     | 2.00      | 2.00       | 4.00          |

Table S10. Weight determination table of three index of flotation collector

comprehensive evaluation system based on flotation test

| B              | B <sub>1</sub> | B <sub>2</sub> | B <sub>3</sub> | B <sub>4</sub> | B <sub>7</sub> | B <sub>8</sub> | Weight |
|----------------|----------------|----------------|----------------|----------------|----------------|----------------|--------|
| B <sub>1</sub> | 1              | 2              | 1/3            | 1/4            | 1/5            | 1/2            | 0.0651 |
| B <sub>2</sub> | 1/2            | 1              | 1/2            | 1/5            | 1/6            | 1/3            | 0.0483 |
| B <sub>3</sub> | 3              | 2              | 1              | 1/2            | 1/3            | 2              | 0.1445 |
| B <sub>4</sub> | 4              | 5              | 2              | 1              | 1/2            | 3              | 0.2547 |
| B <sub>5</sub> | 5              | 6              | 3              | 2              | 1              | 4              | 0.3854 |
| B <sub>6</sub> | 2              | 3              | 1/2            | 1/3            | 1/4            | 1              | 0.1022 |

Table S11. Green data index of collector

| <b>Green index</b> | Dodecane | Dodecyl aldehyde | Methyl laurate | N-octane | 1-octanol | 2-octanone | Valeraldehyde |
|--------------------|----------|------------------|----------------|----------|-----------|------------|---------------|
| C <sub>1</sub>     | -9.6     | 44.5             | 5.2            | -56.8    | -15.5     | -16        | -91.5         |
| C <sub>2</sub>     | 216      | 185              | 267            | 126      | 195       | 174        | 103           |
| C <sub>3</sub>     | 6.1      | 4.989            | 5.41           | 5.18     | 3         | 2.37       | 1.31          |
| C <sub>4</sub>     | 0.7487   | 0.835            | 0.865          | 0.703    | 0.829     | 0.82       | 0.811         |
| C <sub>5</sub>     | 170.33   | 184.32           | 214.35         | 114.23   | 130.23    | 128.21     | 86.13         |
| C <sub>6</sub>     | 1.45     | 3.62             | 4.85           | 0.55     | 4.5       | 4.4        | 3             |
| C <sub>7</sub>     | 6.2      | 8.2              | 8.3            | 6.5      | 4.5       | 4.5        | 7.8           |
| C <sub>8</sub>     | 0.6      | 1                | 1.3            | 0.8      | 0.8       | 1.2        | 2.1           |
| C <sub>9</sub>     | 83       | 101              | 134            | 13       | 81        | 52         | 12            |
| C <sub>10</sub>    | 203      | 200              | 298            | 206      | 253       | 231        | 222           |
| C <sub>11</sub>    | Yes      | Yes              | Yes            | Yes      | Yes       | Yes        | Yes           |
| C <sub>12</sub>    | 1        | 1                | 3              | 1        | 3         | 3          | 4             |
| C <sub>13</sub>    | No       | No               | No             | No       | No        | No         | Yes           |
| C <sub>14</sub>    | 2        | 2                | 2              | 2        | 2         | 2          | 2             |
| C <sub>15</sub>    | 3        | 2                | 1              | 1        | 1         | 3          | 3             |
| C <sub>16</sub>    | 3        | 2                | 2              | 1        | 1         | 3          | 3             |
| C <sub>17</sub>    | No       | No               | No             | No       | No        | No         | No            |
| C <sub>18</sub>    | 1        | 3                | 4              | 1        | 3         | 1          | 3             |
| C <sub>19</sub>    | 5        | 5                | 4              | 4        | 4         | 4          | 5             |
| C <sub>20</sub>    | 2        | 2                | 2              | 2        | 3         | 2          | 2             |
| C <sub>21</sub>    | 2B       | 2A               | 2B             | 2A       | 2A        | 2A         | 2A            |
| C <sub>22</sub>    | 2        | 2                | 3              | 3        | 1         | 3          | 3             |
| C <sub>23</sub>    | 1A       | 2                | 2              | 1A       | 2         | 2          | 2             |
| C <sub>24</sub>    | 2        | 2                | 2              | 2        | 2         | 2          | 2             |
| C <sub>25</sub>    | 1        | 2                | 2              | 1        | 2         | 2          | 2             |
